# Supplementary material for: Molecular simulation of swelling and interlayer structure for organoclay in supercritical CO2
Source: Royal Society of Chemistry journal article supplement (doi:10.1039/c0cp00505c), 2010-10-26
Supplement: c0cp00505c.pdf [file c0cp00505c.pdf]

**Supplementary Information:**

**Molecular Simulation of Swelling and Interlayer Structure  
for Organoclay in Supercritical CO<sub>2</sub>**

**Yanruo Yu, Xiaoning Yang\***

State Key Laboratory of Materials-Oriented Chemical Engineering,

College of Chemistry and Chemical Engineering,

Nanjing University of Technology,

Nanjing 210009, China

E-mail: [Yangxia@njut.edu.cn](mailto:Yangxia@njut.edu.cn) (X. Yang)

\* : Author to whom any correspondence should be addressed.

**Table S1** Atomic coordinates and effective charges in the unit cell of montmorillonite

| No. | Atom | x(Å)   | y(Å)   | z(Å)   | q <sub>i</sub> (e) |
|-----|------|--------|--------|--------|--------------------|
| 1   | AL1  | -0.593 | -2.708 | 0.000  | 1.575              |
| 2   | H1   | 3.809  | 0.342  | 1.434  | 0.425              |
| 3   | O1   | 2.927  | 0.342  | 1.060  | -1.0808            |
| 4   | H2   | 0.285  | 0.342  | -1.434 | 0.425              |
| 5   | O2   | 1.167  | 0.342  | -1.060 | -1.0808            |
| 6   | SI1  | 0.287  | 1.862  | 2.730  | 2.1                |
| 7   | O3   | 0.287  | 1.862  | 1.060  | -1.05              |
| 8   | SI2  | 0.287  | -1.178 | 2.730  | 2.1                |
| 9   | O4   | 0.287  | -1.178 | 1.060  | -1.1808            |
| 10  | SI3  | 2.927  | -2.708 | 2.730  | 2.1                |
| 11  | O5   | 2.927  | -4.228 | 3.280  | -1.05              |
| 12  | O6   | 2.927  | -2.708 | 1.060  | -1.1808            |
| 13  | O7   | 1.607  | -1.948 | 3.280  | -1.05              |
| 14  | O8   | 4.247  | -1.948 | 3.280  | -1.05              |
| 15  | O9   | 0.287  | 0.342  | 3.280  | -1.05              |
| 16  | SI4  | 2.927  | 3.392  | 2.730  | 2.1                |
| 17  | O10  | 2.927  | 3.392  | 1.060  | -1.05              |
| 18  | O11  | 1.607  | 2.622  | 3.280  | -1.05              |
| 19  | O12  | 4.247  | 2.622  | 3.280  | -1.05              |
| 20  | SI5  | 3.807  | -1.178 | -2.730 | 2.1                |
| 21  | O13  | 3.807  | -1.178 | -1.060 | -1.1808            |
| 22  | O14  | 1.167  | -2.708 | -1.060 | -1.1808            |
| 23  | O15  | -0.153 | -1.938 | -3.280 | -1.05              |
| 24  | SI6  | 1.167  | -2.708 | -2.730 | 2.1                |
| 25  | O16  | 2.487  | -1.938 | -3.280 | -1.05              |
| 26  | SI7  | 3.807  | 1.862  | -2.730 | 2.1                |
| 27  | O17  | 3.807  | 1.807  | -1.060 | -1.05              |
| 28  | O18  | 3.807  | 0.342  | -3.280 | -1.05              |
| 29  | SI8  | 1.167  | 3.392  | -2.730 | 2.1                |
| 30  | O19  | 1.167  | 3.392  | -1.060 | -1.05              |
| 31  | O20  | -0.153 | 2.632  | -3.280 | -1.05              |
| 32  | O21  | 1.167  | 4.912  | -3.280 | -1.05              |
| 33  | O22  | 2.487  | 2.632  | -3.280 | -1.05              |
| 34  | AL2  | 2.047  | -1.178 | 0.000  | 1.36               |
| 35  | AL3  | 2.047  | 1.862  | 0.000  | 1.575              |
| 36  | H3   | 2.926  | 4.912  | -1.434 | 0.425              |
| 37  | O23  | 3.807  | 4.912  | -1.060 | -0.95              |
| 38  | AL4  | 4.687  | 3.392  | 0.000  | 1.575              |
| 39  | H4   | 1.169  | -4.223 | 1.434  | 0.425              |
| 40  | O24  | 0.287  | -4.228 | 1.060  | -0.95              |

**Table S2. Potential parameters of ODTA surfactant cation**

|                     | CH <sub>2</sub> | CH <sub>2</sub> <sup>a</sup> | CH <sub>3</sub> | CH <sub>3</sub> <sup>b</sup> | N      |
|---------------------|-----------------|------------------------------|-----------------|------------------------------|--------|
| <b>Charge (e)</b>   | 0               | +0.407                       | 0.0             | +0.407                       | -0.628 |
| <b>ε (kcal/mol)</b> | 0.1984          | 0.1984                       | 0.2500          | 0.2500                       | 0.0774 |
| <b>σ (Å)</b>        | 3.6238          | 3.6238                       | 3.6993          | 3.6993                       | 3.2625 |

**Note:** Charges are derived from Ref 35.

a: -CH<sub>2</sub> binded with N; b: -CH<sub>3</sub> at the end of alkylammonium chain.

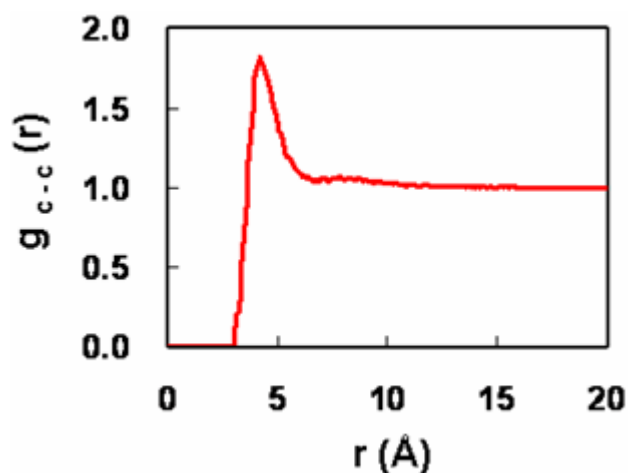

**Fig. S1** The radial distribution function (RDF) of CO<sub>2</sub> fluid in the simulation cell. The position of the peak in the RDF is around 4.2 Å, which is identical with the reference result.

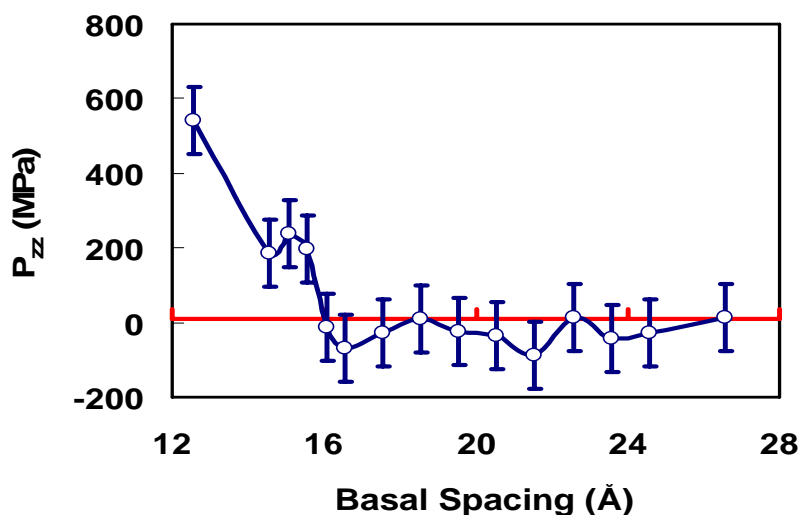

**Fig. S2** Normal component of the pressure tensor as a function of the basal spacing for natural Na-montmorillonites in scCO<sub>2</sub>. The horizontal solid line corresponds to the bulk pressure (8.4MPa)

**Table S3** vdW interaction energies (*E*) in several stable spacings

| Basal spacing (Å) | <i>E</i> (clay-surfactant) kcal/mol | <i>E</i> (Surfactant-surfactant) kcal/mol |
|-------------------|-------------------------------------|-------------------------------------------|
| 13.56 (vacuum)    | 493.57                              | -228.38                                   |
| 18.46             | -315.72                             | -221.63                                   |
| 21.46             | -591.27                             | -203.69                                   |
